# Supplementary material for: A perovskite single crystal with one-dimensional structure enables photodetection with negligible hysteresis
Source: Royal Society of Chemistry journal article supplement (doi:10.1039/d0tc05983h), 2021-01-01
Supplement: d0tc05983h1.pdf [file d0tc05983h1.pdf]

## Supporting Information

### **Perovskite single crystal with one-dimensional structure enables photodetector with negligible hysteresis**

Yiwei Zhang <sup>a</sup>, Fengjing Liu <sup>b</sup>, Chao Jiang <sup>b</sup>, Fawei Tang <sup>c</sup> and Xinping Zhang <sup>a\*</sup>

<sup>a</sup> *Institute of Information Photonics Technology, Faculty of Science, Beijing University of Technology, Beijing 100124, China*

<sup>b</sup> *CAS Key Laboratory of Standardization and Measurement for Nanotechnology & CAS Center for Excellence in Nanoscience, National Center for Nanoscience and Technology, Beijing 100190, China*

<sup>c</sup> *College of Materials Science and Engineering, Key Laboratory of Advanced Functional Materials, Education Ministry of China, Beijing University of Technology, Beijing 100124, China.*

\*Corresponding author Email: [zhangxinping@bjut.edu.cn](mailto:zhangxinping@bjut.edu.cn)

Table S1. Crystallographic Data of the DMEDAPbI<sub>4</sub> single crystal

|                       |                                                                 |
|-----------------------|-----------------------------------------------------------------|
| Temperature           | 296.15K                                                         |
| chemical formula      | C <sub>4</sub> H <sub>12</sub> I <sub>4</sub> N <sub>2</sub> Pb |
| formula weight        | 802.95                                                          |
| crystal system        | orthorhombic                                                    |
| space group           | I m m a                                                         |
| a/Å                   | 15.295                                                          |
| b/Å                   | 6.482                                                           |
| c/Å                   | 15.084                                                          |
| volume/Å <sup>3</sup> | 1496.00                                                         |
| Z                     | 4                                                               |
| μ/mm <sup>-1</sup>    | 19.501                                                          |
| F(000)                | 1376                                                            |

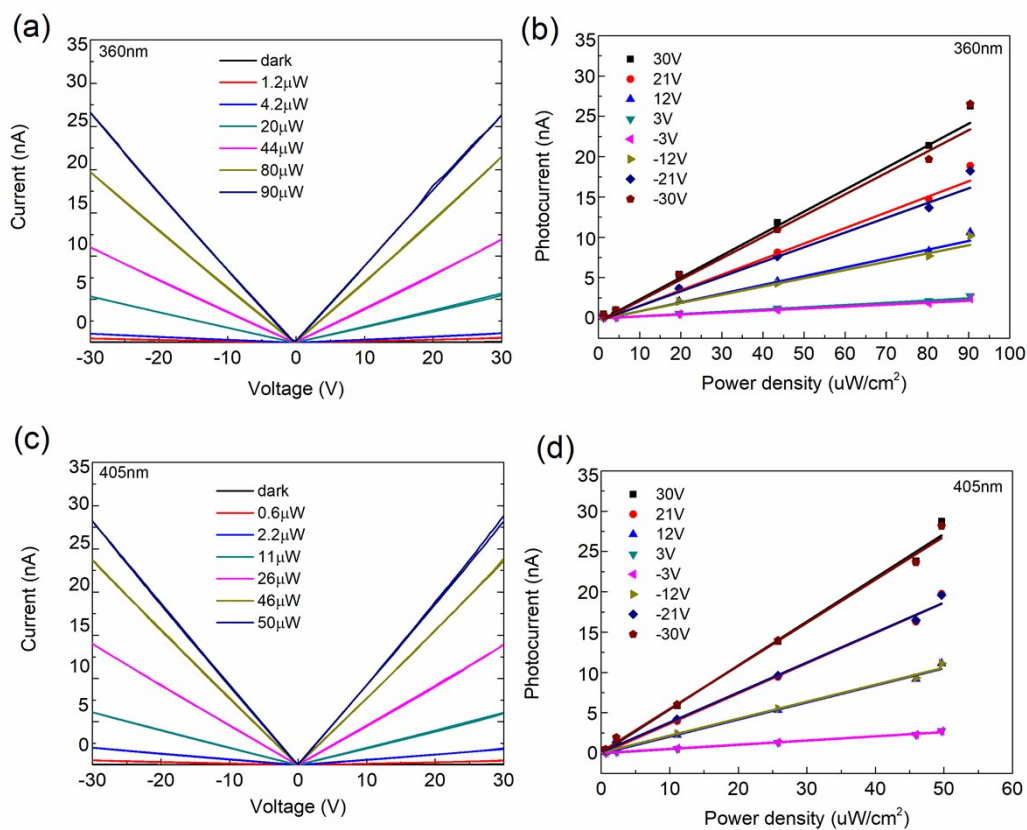

Figure S1. The photoresponsivity of the single crystal based photodetector upon 360nm and 405nm laser.

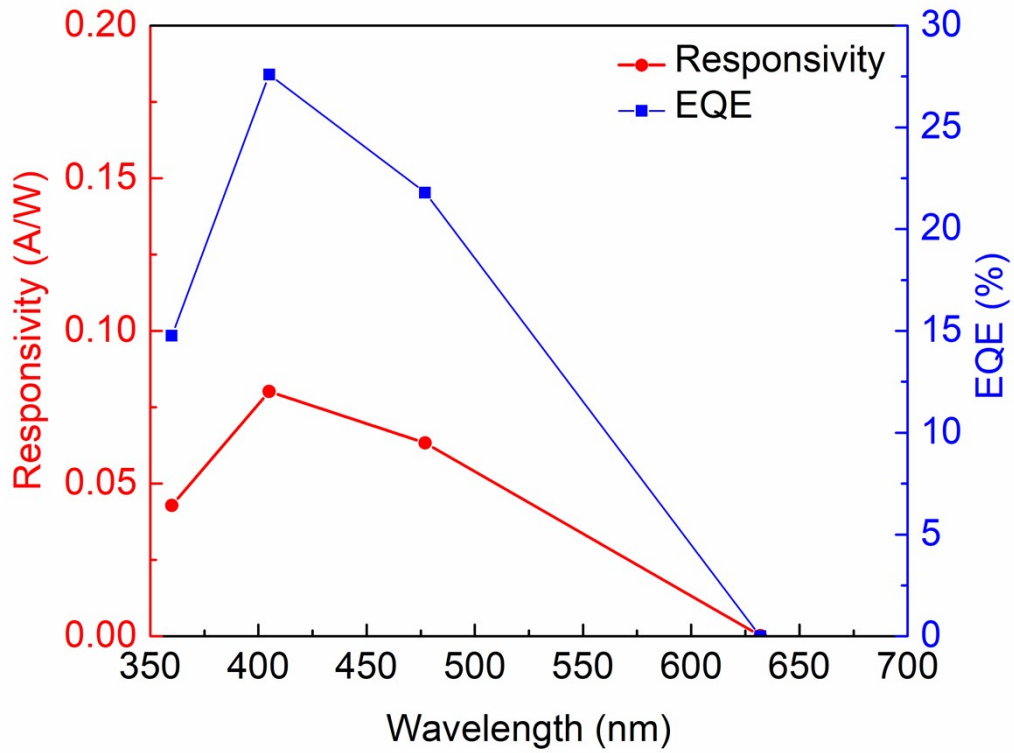

Figure S2. Wavelength dependent responsivity and EQE of the single crystal based photodetector under a constant bias of 3V.

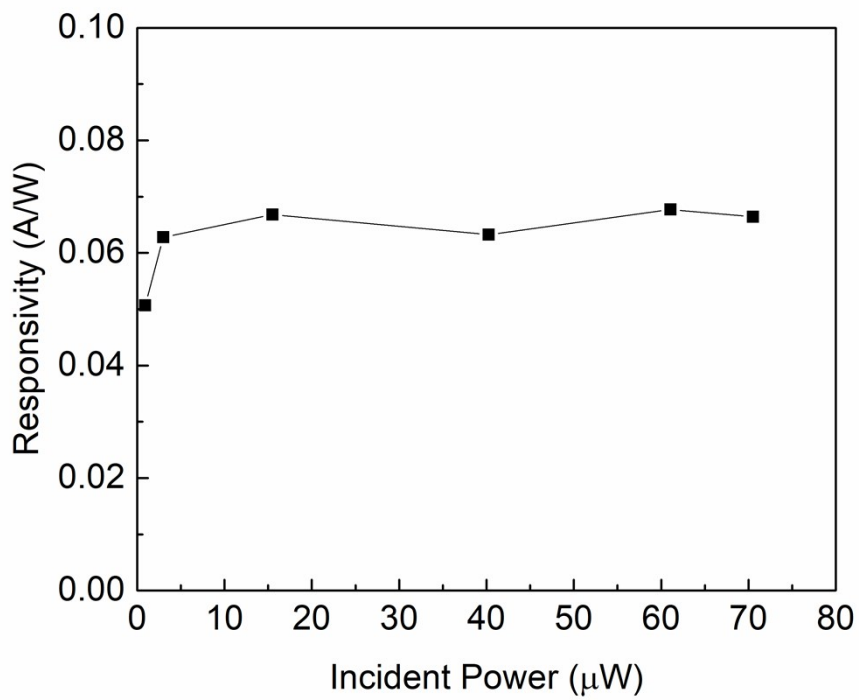

Figure S3. Responsivity as a function of incident power under excitation of 473nm.

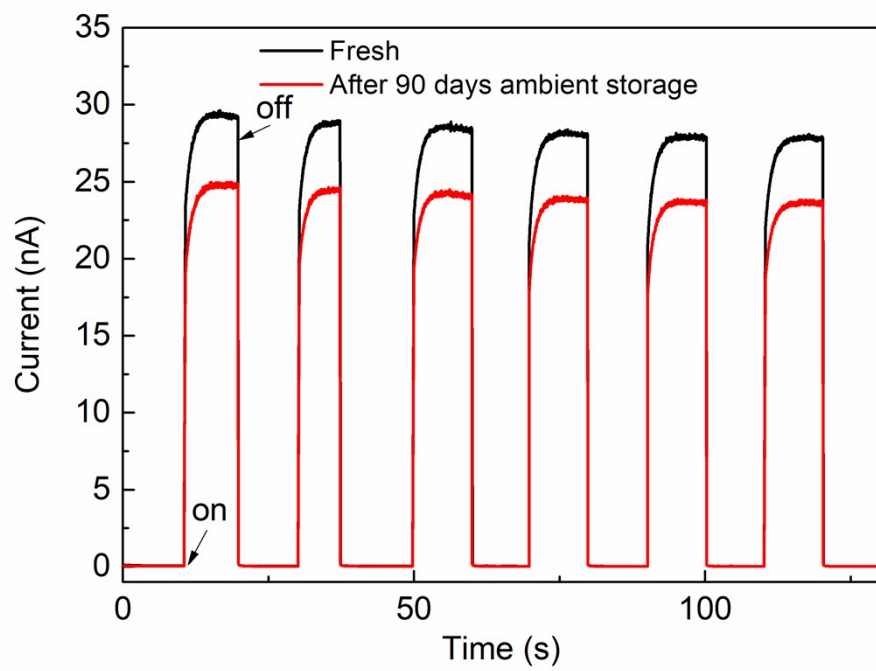

Figure S4. Lifetime performance of the single crystal based photodetector.
